# Supplementary material for: Negative Roles of Strigolactone-Related SMXL6, 7 and 8 Proteins in Drought Resistance in Arabidopsis
Source: MDPI journal article supplement (doi:10.3390/biom10040607), 2020-04-14
Supplement: s1 [file s1]

## Supplementary data

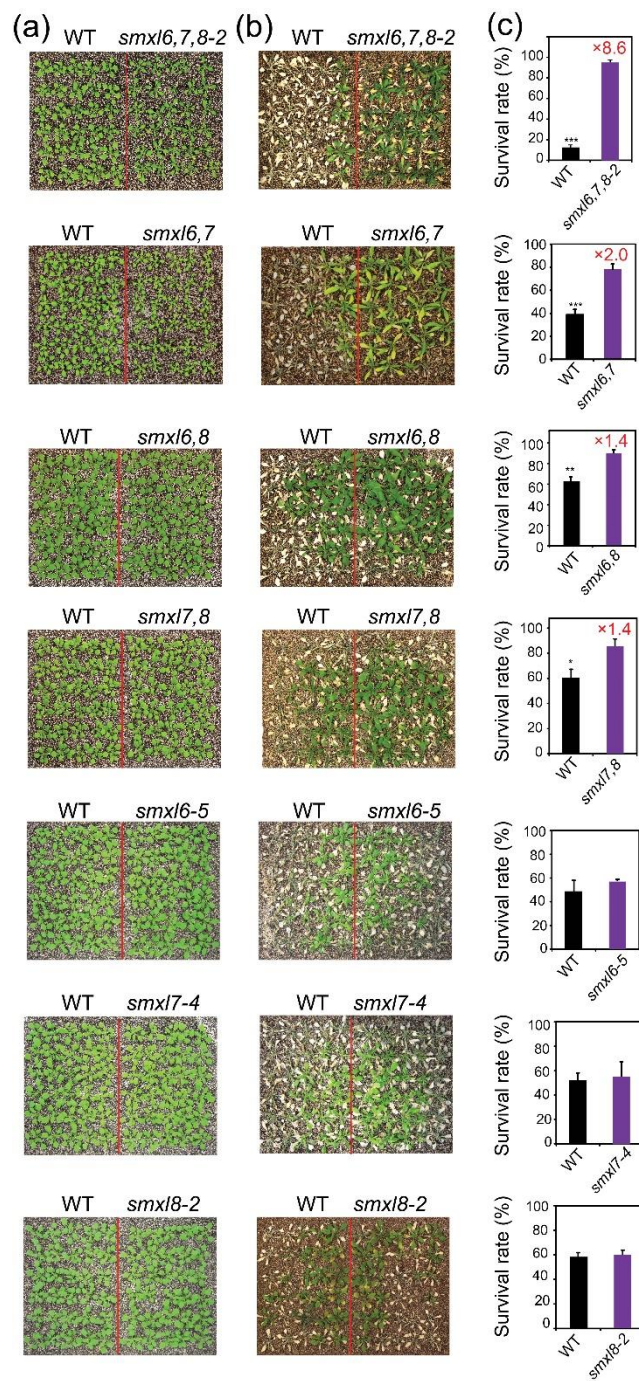

**Figure S1.** Drought-resistant phenotypes of various *smxl* single, double and triple mutant plants. Comparisons of different mutant and wild-type (WT) plants were performed using the ‘same tray’ method. (a) WT and different mutant plants were grown in pairs for 21 days under well-watered conditions in a tray. (b) Water was withheld until distinguishable differences were observed between the two genotypes, then re-watering was conducted. Pictures were taken five days after re-watering, and after inflorescences were removed. (c) Means and standard errors of three independent experiments ( $n = 3$ , 30 plants/genotype/experiment) were used to estimate the survival rates of investigated WT and

different mutant plants. Asterisks indicate significant difference between the two genotypes (Student's *t*-test; \**p* < 0.05, \*\**p* < 0.01, \*\*\**p* < 0.001). Red numbers above the error bar indicate the fold-change in survival rate between the two genotypes.

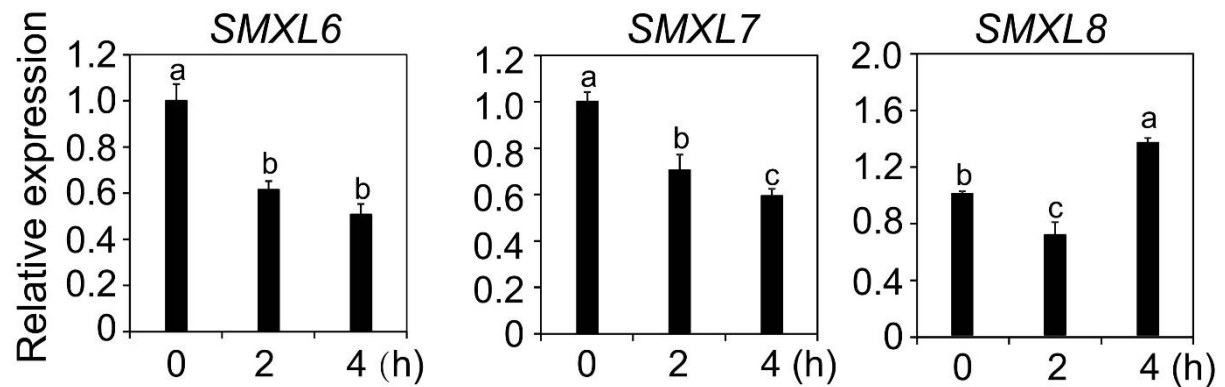

**Figure S2.** Expression of *SMXL6*, 7 and 8 genes in wild-type plants under normal and dehydration conditions. Rosette leaves of 24-day-old soil-grown plants were used for qRT-PCR analysis. Relative transcript levels were normalized to a value of 1 in the non-dehydrated sample. Data are means and standard errors (*n* = 3 biological replicates). Letters above the error bars show significant differences in all combinations (Tukey's honest significant difference test; *p* < 0.05).

**Table S1.** Primers used for qRT-PCR

| Gene name      | AGI code  | Prime name | Primer pair (5'-3' sequence) |
|----------------|-----------|------------|------------------------------|
| <i>F3'H</i>    | AT5G07990 | F3'H-F     | AGACATCGCTCAGCTTCCTT         |
|                |           | F3'H-R     | TGGTGGATGAAGCCTGAAAT         |
| <i>WSD1</i>    | AT5G37300 | WSD1-F     | GCTTGGTGGTTGTTTGTGTTGG       |
|                |           | WSD1-R2    | TCGGGTTACCCATAAGAGGG         |
| <i>SAG29</i>   | AT5G13170 | SAG29-F    | GCCACCAGGGAGAAAAGG           |
|                |           | SAG29-R    | CCACGAAATGTGTTACCATTAGAA     |
| <i>ABI5</i>    | AT2G36270 | ABI5-F     | GCCACCGGTTTTTAGACACA         |
|                |           | ABI5-R     | AGTAAACGGATGATTCTCACCAC      |
| <i>PDH1</i>    | AT3G30775 | PDH1-F     | AGCTGCCAAATCTTTACCAACATC     |
|                |           | PDH1-R     | GCTTCCATGAGAGTTTGAAGTTGCG    |
| <i>PDH2</i>    | AT5G38710 | PDH2-F     | GTGCTTTAGACCGCCAACTT         |
|                |           | PDH2-R     | TGTGTCTTCACCAAGCCATAA        |
| <i>WRKY46</i>  | AT2G46400 | WRKY46-F   | ACATCACATCCCCGAAGACG         |
|                |           | WRKY46-R   | ACTTCTTCGGACTTGGTCGG         |
| <i>QQS</i>     | AT3G30720 | QQS-F      | TTCTCCACAGCGACCAGTTG         |
|                |           | QQS-R      | CCCTCATTTTGAGCCTTGCG         |
| <i>LEA/ABR</i> | AT3G02480 | LEA/ABR-F  | AGACTCCTTGCAACAGACTGGAC      |
|                |           | LEA/ABR-R  | TCCTTGACGACATCAGCAGCTC       |
| <i>LEA18</i>   | AT2G35300 | LEA18-F    | GGTCATGCGGAGAAGACGAT         |
|                |           | LEA18-R    | GCATGCTCAGCCTTGGATTG         |
| <i>LEA76</i>   | AT3G15670 | LEA670-F   | TTATCGGAGACAGGCGAAGC         |
|                |           | LEA670-R   | CACCCGTCTTGTCTCTACCG         |
| <i>SMXL6</i>   | AT1G07200 | SMXL6-F    | CGGGCTATTGAGACCAAAGA         |
|                |           | SMXL6-R    | GGACTCACCGACTGAAAACC         |
| <i>SMXL7</i>   | AT2G29970 | SMXL7-F    | AGCCCTTAAGTCTCAGCGTTCG       |
|                |           | SMXL7-R    | TACGCTTCGTCTTCGTTTGCTTC      |
| <i>SMXL8</i>   | AT2G40130 | SMXL8-F    | GCCACCTTGGTTACAAATGACCAC     |
|                |           | SMXL8-R    | ACCCTTCTTTGGTCTGCACTTGG      |
| <i>UBQ10</i>   | AT4G05320 | UBQ10-F    | GAAGTTCAATGTTTCGTTTCATGT     |
|                |           | UBQ10-R    | GGATTATACAAGGCCCCCAAAA       |
